# Supplementary material for: Keratinocytes Determine Th1 Immunity during Early Experimental Leishmaniasis
Source: PubMed Central journal article supplement (PMC2861693; doi:10.1371/journal.ppat.1000871), 2010-04-29
Supplement: ppat.1000871.s001.pdf [file ppat.1000871.s001.pdf]

**Table S1. Genes regulated in BALB/c mice**

MW N-fold = mean regulation compared to uninfected control, TTEST = p-value for regulation in BALB/c (BALB) or C57BL/6 (C57) mice

| Gene Symbol               | Gene Title                                                                               | MW N-fold BALB | MW N-fold C57 | TTEST BALB | TTEST C57 |
|---------------------------|------------------------------------------------------------------------------------------|----------------|---------------|------------|-----------|
| <b>Genes Up-regulated</b> |                                                                                          |                |               |            |           |
| Cxcl10                    | chemokine (C-X-C motif) ligand 10                                                        | 34.5           | 125.7         | 0.0015     | 0.0022    |
| Isg20                     | interferon-stimulated protein                                                            | 31.8           | 35.1          | 0.0016     | <0.001    |
| Fcgr1                     | Fc receptor, IgG, high affinity I                                                        | 30.9           | 83.6          | 0.0012     | <0.001    |
| Mx1                       | myxovirus (influenza virus) resistance 1                                                 | 30.4           | 26.7          | <0.001     | <0.001    |
| G1p2                      | interferon, alpha-inducible protein                                                      | 27.8           | 111.2         | 0.0014     | 0.0011    |
| Ifit2                     | interferon-induced protein with tetratricopeptide repeats 2                              | 25.5           | 29.9          | <0.001     | <0.001    |
| Irg1                      | immunoresponsive gene 1                                                                  | 24.8           | 77.8          | <0.001     | <0.001    |
| Slfn3                     | schlafen 3                                                                               | 22.5           | 42.8          | <0.001     | <0.001    |
| Vig1-pending              | viral hemorrhagic septicemia virus(VHSV) induced gene 1                                  | 22.5           | 47.7          | <0.001     | <0.001    |
| Ifit1                     | interferon-induced protein with tetratricopeptide repeats 1                              | 20.0           | 29.7          | <0.001     | <0.001    |
| Ifi47                     | interferon gamma inducible protein                                                       | 19.6           | 21.9          | <0.001     | <0.001    |
| Tyki                      | thymidylate kinase family LPS-inducible member                                           | 18.7           | 17.4          | <0.001     | <0.001    |
| Ccl4                      | chemokine (C-C motif) ligand 4                                                           | 18.7           | 34.6          | <0.001     | <0.001    |
| Tgtp                      | T-cell specific GTPase                                                                   | 18.6           | 10.1          | <0.001     | 0.0017    |
| Slfn4                     | schlafen 4                                                                               | 18.4           | 52.2          | <0.001     | <0.001    |
| Ifit3                     | interferon-induced protein with tetratricopeptide repeats 3                              | 18.2           | 25.4          | <0.001     | <0.001    |
| Gbp1                      | guanylate nucleotide binding protein 1                                                   | 18.0           | 0.6           | <0.001     | 0.3828    |
| Csf3r                     | colony stimulating factor 3 receptor (granulocyte)                                       | 16.7           | 20.7          | <0.001     | <0.001    |
| Klra2                     | killer cell lectin-like receptor, subfamily A, member 2                                  | 16.5           | 4.5           | <0.001     | 0.0416    |
| Usp18                     | ubiquitin specific protease 18                                                           | 16.0           | 37.8          | <0.001     | 0.0019    |
| Il6                       | interleukin 6                                                                            | 15.7           | 15.2          | 0.0014     | 0.0257    |
| Ccl3                      | chemokine (C-C motif) ligand 3                                                           | 15.0           | 28.1          | 0.0013     | <0.001    |
| Kdap                      | kidney-derived aspartic protease-like protein                                            | 14.5           | 24.5          | <0.001     | <0.001    |
| Clecsf8                   | C-type (calcium dependent, carbohydrate recognition domain) lectin, superfamily member 8 | 14.1           | 40.7          | <0.001     | <0.001    |
| Plac8                     | placenta-specific 8                                                                      | 14.0           | 30.5          | <0.001     | <0.001    |
| Nmi                       | N-myc (and STAT) interactor                                                              | 13.0           | 8.0           | 0.0369     | 0.0011    |
| Cxcl2                     | chemokine (C-X-C motif) ligand 2                                                         | 12.2           | 23.9          | <0.001     | <0.001    |
| Ccl7                      | chemokine (C-C motif) ligand 7                                                           | 12.0           | 16.2          | <0.001     | <0.001    |
| Ccl5                      | chemokine (C-C motif) ligand 5                                                           | 11.9           | 13.9          | 0.0014     | <0.001    |
| Mad                       | Max dimerization protein                                                                 | 11.6           | 2.8           | 0.0177     | <0.001    |
| Adam8                     | a disintegrin and metalloprotease domain 8                                               | 11.1           | 23.1          | <0.001     | <0.001    |
| Fmnl                      | formin-like                                                                              | 10.7           | 38.9          | 0.0055     | <0.001    |
| Irf7                      | interferon regulatory factor 7                                                           | 10.5           | 15.7          | <0.001     | <0.001    |
| Trim30                    | tripartite motif protein 30                                                              | 10.5           | 11.9          | <0.001     | <0.001    |
| ligp-pending              | interferon-inducible GTPase                                                              | 10.1           | 6.1           | <0.001     | 0.0065    |
| Il1b                      | interleukin 1 beta                                                                       | 9.8            | 39.2          | 0.0032     | <0.001    |
| Gbp2                      | guanylate nucleotide binding protein 2                                                   | 9.6            | 12.4          | <0.001     | <0.001    |
| Cxcl5                     | chemokine (C-X-C motif) ligand 5                                                         | 9.3            | 18.3          | <0.001     | <0.001    |
| Csprs                     | component of Sp100-rs                                                                    | 9.3            | 5.4           | 0.0245     | 0.1426    |
| Fpr-rs2                   | formyl peptide receptor, related sequence 2                                              | 9.2            | 12.0          | <0.001     | <0.001    |
| Il1rn                     | interleukin 1 receptor antagonist                                                        | 8.8            | 8.9           | <0.001     | <0.001    |
| Slfn2                     | schlafen 2                                                                               | 8.7            | 12.8          | <0.001     | <0.001    |
| Ccl2                      | chemokine (C-C motif) ligand 2                                                           | 8.7            | 12.0          | <0.001     | <0.001    |
| Sell                      | selectin, lymphocyte                                                                     | 8.4            | 12.3          | <0.001     | <0.001    |

|                   |                                                                                         |     |       |        |        |
|-------------------|-----------------------------------------------------------------------------------------|-----|-------|--------|--------|
| Gp49a             | glycoprotein 49 A                                                                       | 8.4 | 13.4  | <0.001 | <0.001 |
| S100a9            | S100 calcium binding protein A9 (calgranulin B)                                         | 8.3 | 24.6  | 0.0054 | <0.001 |
| 5830484<br>A20Rik | RIKEN cDNA 5830484A20 gene                                                              | 8.2 | 5.8   | <0.001 | <0.001 |
| Ccr5              | chemokine (C-C motif) receptor 5                                                        | 8.1 | 142.5 | 0.0024 | <0.001 |
| Cxcl9             | chemokine (C-X-C motif) ligand 9                                                        | 8.0 | 4.8   | 0.0291 | 0.0073 |
| Ms4a4c            | membrane-spanning 4-domains, subfamily A, member 4C                                     | 7.8 | 11.4  | <0.001 | <0.001 |
| Ifi204            | interferon activated gene 204                                                           | 7.7 | 13.1  | <0.001 | <0.001 |
| Ms4a6b            | membrane-spanning 4-domains, subfamily A, member 6B                                     | 7.7 | 42.8  | <0.001 | 0.0017 |
| Gbp3              | guanylate nucleotide binding protein 3                                                  | 7.7 | 6.4   | <0.001 | 0.0010 |
| Psmb9             | proteasome (prosome, macropain) subunit, beta type 9 (large multifunctional protease 2) | 7.4 | 15.2  | <0.001 | <0.001 |
| Basp1             | brain abundant, membrane attached signal protein 1                                      | 7.3 | 15.3  | <0.001 | <0.001 |
| Saa3              | serum amyloid A 3                                                                       | 7.2 | 28.1  | 0.0070 | <0.001 |
| Hdc               | histidine decarboxylase                                                                 | 7.1 | 9.0   | 0.0017 | <0.001 |
| Krt1-16           | keratin complex 1, acidic, gene 16                                                      | 7.0 | 5.9   | <0.001 | 0.0030 |
| Ifi205            | interferon activated gene 205                                                           | 7.0 | 13.1  | <0.001 | <0.001 |
| Igtp              | interferon gamma induced GTPase                                                         | 6.9 | 4.4   | <0.001 | 0.0017 |
| A33007<br>5D07    | hypothetical protein A330075D07                                                         | 6.9 | 10.5  | <0.001 | <0.001 |
| H2-T24            | histocompatibility 2, T region locus 24                                                 | 6.8 | 12.0  | <0.001 | <0.001 |
| 9130009<br>C22Rik | RIKEN cDNA 9130009C22 gene                                                              | 6.6 | 7.0   | <0.001 | <0.001 |
| F10               | coagulation factor X                                                                    | 6.6 | 37.0  | 0.0027 | 0.0021 |
| Rgl1              | ral guanine nucleotide dissociation stimulator,-like 1                                  | 6.5 | 11.5  | 0.0108 | <0.001 |
| Plscr2            | phospholipid scramblase 2                                                               | 6.5 | 4.8   | 0.0123 | 0.0647 |
| Ifi1              | interferon inducible protein 1                                                          | 6.2 | 5.9   | <0.001 | <0.001 |
| Bid               | BH3 interacting domain death agonist                                                    | 6.2 | 2.2   | 0.0374 | 0.0376 |
| Cxcr4             | chemokine (C-X-C motif) receptor 4                                                      | 6.1 | 10.6  | 0.0022 | 0.0012 |
| Ccr1              | chemokine (C-C motif) receptor 1                                                        | 6.1 | 11.6  | <0.001 | <0.001 |
| Slfn1             | schlafen 1                                                                              | 6.1 | 9.0   | <0.001 | <0.001 |
| Samhd1            | SAM domain and HD domain, 1                                                             | 6.0 | 6.9   | <0.001 | <0.001 |
| Ptx3              | pentaxin related gene                                                                   | 5.8 | 3.2   | 0.0098 | 0.0026 |
| S100a8            | S100 calcium binding protein A8 (calgranulin A)                                         | 5.7 | 18.8  | 0.0022 | <0.001 |
| Gtpi-<br>pending  | interferon-g induced GTPase                                                             | 5.6 | 3.8   | <0.001 | <0.001 |
| Stat1             | signal transducer and activator of transcription 1                                      | 5.5 | 5.8   | <0.001 | <0.001 |
| Lcn2              | lipocalin 2                                                                             | 5.4 | 10.8  | <0.001 | <0.001 |
| Ogfr              | opioid growth factor receptor                                                           | 5.4 | 3.5   | 0.0035 | <0.001 |
| Prg               | proteoglycan, secretory granule                                                         | 5.4 | 8.6   | <0.001 | <0.001 |
| Ifi202b           | interferon activated gene 202B                                                          | 5.4 | -1.6  | <0.001 | 0.0716 |
| Ifi203            | interferon activated gene 203                                                           | 5.3 | 11.3  | <0.001 | <0.001 |
| Mx2               | myxovirus (influenza virus) resistance 2                                                | 5.2 | 3.6   | <0.001 | <0.001 |
| Hck               | hemopoietic cell kinase                                                                 | 5.2 | 8.9   | <0.001 | <0.001 |
| Ccl12             | chemokine (C-C motif) ligand 12                                                         | 5.2 | 7.5   | <0.001 | 0.0062 |
| Crap              | cardiac responsive adriamycin protein                                                   | 5.1 | 2.6   | 0.0518 | 0.1047 |
| Psmb8             | proteasome (prosome, macropain) subunit, beta type 8 (large multifunctional protease 7) | 4.9 | 6.0   | <0.001 | <0.001 |
| Timp1             | tissue inhibitor of metalloproteinase 1                                                 | 4.9 | 7.5   | <0.001 | <0.001 |
| Krt2-5            | keratin complex 2, basic, gene 5                                                        | 4.8 | 7.1   | <0.001 | <0.001 |
| Pdk4              | pyruvate dehydrogenase kinase, isoenzyme 4                                              | 4.8 | 3.3   | 0.0188 | 0.0943 |
| Spp1              | secreted phosphoprotein 1                                                               | 4.8 | 28.3  | <0.001 | <0.001 |
| Cd53              | CD53 antigen                                                                            | 4.7 | 10.4  | 0.0036 | <0.001 |
| Msr1              | macrophage scavenger receptor 1                                                         | 4.7 | 4.1   | 0.0051 | 0.0010 |
| Mmp3              | matrix metalloproteinase 3                                                              | 4.7 | 8.0   | <0.001 | <0.001 |
| Tap1              | transporter 1, ATP-binding cassette, sub-family B                                       | 4.6 | 5.4   | <0.001 | <0.001 |

|               |                                                                                                                  |     |      |        |        |
|---------------|------------------------------------------------------------------------------------------------------------------|-----|------|--------|--------|
|               | (MDR/TAP)                                                                                                        |     |      |        |        |
| Ccr12         | chemokine (C-C motif) receptor-like 2                                                                            | 4.6 | 9.3  | 0.0020 | 0.0358 |
| Mlp           | MARCKS-like protein                                                                                              | 4.5 | 5.4  | <0.001 | <0.001 |
| Rrad          | Ras-related associated with diabetes                                                                             | 4.5 | 4.0  | 0.0011 | 0.0154 |
| Ninj1         | ninjurin 1                                                                                                       | 4.3 | 4.8  | 0.0138 | <0.001 |
| Mpeg1         | macrophage expressed gene 1                                                                                      | 4.2 | 12.3 | 0.0018 | <0.001 |
| 2010008       | RIKEN cDNA 2010008K16 gene                                                                                       | 4.2 | 4.7  | <0.001 | <0.001 |
| K16Rik        |                                                                                                                  |     |      |        |        |
| Itgb2         | integrin beta 2                                                                                                  | 4.2 | 9.1  | <0.001 | <0.001 |
| Vav1          | vav 1 oncogene                                                                                                   | 4.1 | 8.6  | <0.001 | 0.0046 |
| Gla           | galactosidase, alpha                                                                                             | 4.1 | 3.2  | 0.0072 | 0.0054 |
| Ptpcr         | protein tyrosine phosphatase, receptor type, C                                                                   | 4.0 | 6.2  | 0.0054 | 0.0042 |
| Lgals9        | lectin, galactose binding, soluble 9                                                                             | 4.0 | 4.3  | <0.001 | <0.001 |
| Lst1          | leukocyte specific transcript 1                                                                                  | 3.9 | 4.0  | <0.001 | <0.001 |
| Gch           | GTP cyclohydrolase 1                                                                                             | 3.9 | 2.3  | 0.0013 | 0.0070 |
| Ltb           | lymphotoxin B                                                                                                    | 3.8 | 3.1  | 0.0016 | <0.001 |
| Cd52          | CD52 antigen                                                                                                     | 3.8 | 8.5  | <0.001 | <0.001 |
| Pnp           | purine-nucleoside phosphorylase                                                                                  | 3.8 | 3.4  | <0.001 | <0.001 |
| Icam1         | intercellular adhesion molecule                                                                                  | 3.8 | 3.1  | 0.0035 | 0.0031 |
| Ms4a4d        | membrane-spanning 4-domains, subfamily A, member 4D                                                              | 3.8 | 3.8  | <0.001 | <0.001 |
| Ptafr         | platelet-activating factor receptor                                                                              | 3.7 | 3.7  | <0.001 | 0.0158 |
| Tyrobp        | TYRO protein tyrosine kinase binding protein                                                                     | 3.7 | 10.0 | 0.0019 | <0.001 |
| Il15          | interleukin 15                                                                                                   | 3.7 | 9.6  | 0.0225 | 0.0350 |
| Apobec1       | apolipoprotein B editing complex 1                                                                               | 3.7 | 3.9  | <0.001 | 0.0010 |
| Cxcl1         | chemokine (C-X-C motif) ligand 1                                                                                 | 3.7 | 4.0  | 0.0031 | 0.0271 |
| Tnfrsf1b      | tumor necrosis factor receptor superfamily, member 1b                                                            | 3.7 | 7.8  | <0.001 | <0.001 |
| Socs3         | suppressor of cytokine signaling 3                                                                               | 3.7 | 3.8  | <0.001 | 0.0069 |
| Sema4d        | sema domain, immunoglobulin domain (Ig), transmembrane domain (TM) and short cytoplasmic domain, (semaphorin) 4D | 3.6 | 4.9  | <0.001 | <0.001 |
| Ncf4          | neutrophil cytosolic factor 4                                                                                    | 3.6 | 11.1 | 0.0018 | <0.001 |
| Krt2-6a       | keratin complex 2, basic, gene 6a                                                                                | 3.6 | 3.5  | 0.0028 | <0.001 |
| Irf1          | interferon regulatory factor 1                                                                                   | 3.6 | 3.5  | <0.001 | <0.001 |
| Sprr2a        | small proline-rich protein 2A                                                                                    | 3.5 | 7.3  | <0.001 | <0.001 |
| Dck           | deoxycytidine kinase                                                                                             | 3.5 | 4.3  | 0.0803 | 0.0023 |
| Tap2          | transporter 2, ATP-binding cassette, sub-family B (MDR/TAP)                                                      | 3.4 | 3.2  | <0.001 | 0.0013 |
| 1300004       | RIKEN cDNA 1300004C08 gene                                                                                       | 3.4 | 3.1  | <0.001 | <0.001 |
| C08Rik        |                                                                                                                  |     |      |        |        |
| Pla2g7        | phospholipase A2, group VII (platelet-activating factor acetylhydrolase, plasma)                                 | 3.4 | 4.7  | 0.0080 | <0.001 |
| Ppicap        | peptidylprolyl isomerase C-associated protein                                                                    | 3.3 | 4.3  | <0.001 | <0.001 |
| Pira1         | paired-Ig-like receptor A1                                                                                       | 3.3 | 4.3  | 0.0021 | <0.001 |
| Lyn           | Yamaguchi sarcoma viral (v-yes-1) oncogene homolog                                                               | 3.2 | 3.8  | 0.0014 | <0.001 |
| Psmb10        | proteasome (prosome, macropain) subunit, beta type 10                                                            | 3.1 | 3.0  | 0.0016 | 0.0017 |
| Arg2          | arginase type II                                                                                                 | 3.1 | 2.3  | <0.001 | 0.0017 |
| Prkr          | protein kinase, interferon-inducible double stranded RNA dependent                                               | 3.1 | 2.9  | <0.001 | <0.001 |
| Adar          | adenosine deaminase, RNA-specific                                                                                | 3.1 | 2.7  | <0.001 | <0.001 |
| Fln29-pending | FLN29 gene product                                                                                               | 3.1 | 2.5  | <0.001 | <0.001 |
| Ly6e          | lymphocyte antigen 6 complex, locus E                                                                            | 3.1 | 2.6  | <0.001 | <0.001 |
| Lcp2          | lymphocyte cytosolic protein 2                                                                                   | 3.1 | 4.3  | <0.001 | <0.001 |
| Saa2          | serum amyloid A 2                                                                                                | 3.0 | 6.0  | <0.001 | <0.001 |
| Gp38          | glycoprotein 38                                                                                                  | 3.0 | 4.4  | 0.0129 | <0.001 |

|                             |                                                                                |      |      |        |        |
|-----------------------------|--------------------------------------------------------------------------------|------|------|--------|--------|
| Casp4                       | caspase 4, apoptosis-related cysteine protease                                 | 3.0  | 3.3  | 0.0011 | <0.001 |
| Slc7a8                      | solute carrier family 7 (cationic amino acid transporter, y+ system), member 8 | 3.0  | 4.8  | 0.0100 | <0.001 |
| Tor3a                       | torsin family 3, member A                                                      | 3.0  | 2.2  | <0.001 | <0.001 |
| Chi3l3                      | chitinase 3-like 3                                                             | 3.0  | 14.8 | 0.0025 | <0.001 |
| <b>Down-regulated Genes</b> |                                                                                |      |      |        |        |
| Temt                        | thioether S-methyltransferase                                                  | -3.4 | -6.5 | <0.001 | <0.001 |
| Myl3                        | myosin, light polypeptide 3, alkali; ventricular, skeletal, slow               | -2.4 | -2.0 | 0.0014 | 0.0036 |
