# Supplementary material for: Keratinocytes Determine Th1 Immunity during Early Experimental Leishmaniasis
Source: PubMed Central journal article supplement (PMC2861693; doi:10.1371/journal.ppat.1000871), 2010-04-29
Supplement: ppat.1000871.s002.pdf [file ppat.1000871.s002.pdf]

**Table S2. Genes regulated in C57BL/6 mice**

MW N-fold = mean regulation compared to uninfected control, TTEST = p-value for regulation in C57BL/6 (C57) or BALB/c (BALB) mice

| Gene Symbol               | Gene Title                                                                               | MW N-fold C57 | MW N-fold BALB | TTEST C57 reg | TTEST BALB reg |
|---------------------------|------------------------------------------------------------------------------------------|---------------|----------------|---------------|----------------|
| <b>Genes Up-regulated</b> |                                                                                          |               |                |               |                |
| Ccr5                      | chemokine (C-C motif) receptor 5                                                         | 142.5         | 8.1            | <0.001        | 0.0024         |
| Cxcl10                    | chemokine (C-X-C motif) ligand 10                                                        | 125.7         | 34.5           | 0.0022        | 0.0015         |
| G1p2                      | interferon, alpha-inducible protein                                                      | 111.2         | 27.8           | 0.0011        | 0.0014         |
| Fcgr1                     | Fc receptor, IgG, high affinity I                                                        | 83.6          | 30.9           | <0.001        | 0.0012         |
| Irg1                      | immunoresponsive gene 1                                                                  | 77.8          | 24.8           | <0.001        | <0.001         |
| AI447904                  | expressed sequence AI447904                                                              | 57.8          | 8.7            | <0.001        | 0.0013         |
| Slfn4                     | schlafen 4                                                                               | 52.2          | 18.4           | <0.001        | <0.001         |
| Vig1-pending              | viral hemorrhagic septicemia virus(VHSV) induced gene 1                                  | 47.7          | 22.5           | <0.001        | <0.001         |
| Slfn3                     | schlafen 3                                                                               | 42.8          | 22.5           | <0.001        | <0.001         |
| Ms4a6b                    | membrane-spanning 4-domains, subfamily A, member 6B                                      | 42.8          | 7.7            | 0.0017        | <0.001         |
| Clecsf8                   | C-type (calcium dependent, carbohydrate recognition domain) lectin, superfamily member 8 | 40.7          | 14.1           | <0.001        | <0.001         |
| Il1b                      | interleukin 1 beta                                                                       | 39.2          | 9.8            | <0.001        | 0.0032         |
| Fmnl                      | formin-like                                                                              | 38.9          | 10.7           | <0.001        | 0.0055         |
| Usp18                     | ubiquitin specific protease 18                                                           | 37.8          | 16.0           | 0.0019        | <0.001         |
| F10                       | coagulation factor X                                                                     | 37.0          | 6.6            | 0.0021        | 0.0027         |
| Isg20                     | interferon-stimulated protein                                                            | 35.1          | 31.8           | <0.001        | 0.0016         |
| Ccl4                      | chemokine (C-C motif) ligand 4                                                           | 34.6          | 18.7           | <0.001        | <0.001         |
| Plac8                     | placenta-specific 8                                                                      | 30.5          | 14.0           | <0.001        | <0.001         |
| Ifit2                     | interferon-induced protein with tetratricopeptide repeats 2                              | 29.9          | 25.5           | <0.001        | <0.001         |
| Ifit1                     | interferon-induced protein with tetratricopeptide repeats 1                              | 29.7          | 20.0           | <0.001        | <0.001         |
| Spp1                      | secreted phosphoprotein 1                                                                | 28.3          | 4.8            | <0.001        | <0.001         |
| Saa3                      | serum amyloid A 3                                                                        | 28.1          | 7.2            | <0.001        | 0.0070         |
| Ccl3                      | chemokine (C-C motif) ligand 3                                                           | 28.1          | 15.0           | <0.001        | 0.0013         |
| Mx1                       | myxovirus (influenza virus) resistance 1                                                 | 26.7          | 30.4           | <0.001        | <0.001         |
| Ifit3                     | interferon-induced protein with tetratricopeptide repeats 3                              | 25.4          | 18.2           | <0.001        | <0.001         |
| S100a9                    | S100 calcium binding protein A9 (calgranulin B)                                          | 24.6          | 8.3            | <0.001        | 0.0054         |
| Kdap                      | kidney-derived aspartic protease-like protein                                            | 24.5          | 14.5           | <0.001        | <0.001         |
| Slfn2                     | schlafen 2                                                                               | 24.2          | 6.4            | 0.0018        | <0.001         |
| Cxcl2                     | chemokine (C-X-C motif) ligand 2                                                         | 23.9          | 12.2           | <0.001        | <0.001         |
| Adam8                     | a disintegrin and metalloprotease domain 8                                               | 23.1          | 11.1           | <0.001        | <0.001         |
| Ifi47                     | interferon gamma inducible protein                                                       | 21.9          | 19.6           | <0.001        | <0.001         |
| Csf3r                     | colony stimulating factor 3 receptor (granulocyte)                                       | 20.7          | 16.7           | <0.001        | <0.001         |
| Ilgam                     | integrin alpha M                                                                         | 20.5          | 4.8            | <0.001        | 0.0198         |
| Fcer1g                    | Fc receptor, IgE, high affinity I, gamma polypeptide                                     | 20.3          | 9.7            | 0.0058        | 0.0070         |
| S100a8                    | S100 calcium binding protein A8 (calgranulin A)                                          | 18.8          | 5.7            | <0.001        | 0.0022         |
| Cxcl5                     | chemokine (C-X-C motif) ligand 5                                                         | 18.3          | 9.3            | <0.001        | <0.001         |
| Tyki                      | thymidylate kinase family LPS-inducible member                                           | 17.4          | 18.7           | <0.001        | <0.001         |
| Ccl7                      | chemokine (C-C motif) ligand 7                                                           | 16.2          | 12.0           | <0.001        | <0.001         |
| Irf7                      | interferon regulatory factor 7                                                           | 15.7          | 10.5           | <0.001        | <0.001         |
| Basp1                     | brain abundant, membrane attached signal protein 1                                       | 15.3          | 7.3            | <0.001        | <0.001         |
| Psmb9                     | proteosome (prosome, macropain) subunit, beta type 9 (large multifunctional protease 2)  | 15.2          | 7.4            | <0.001        | <0.001         |
| Il6                       | interleukin 6                                                                            | 15.2          | 15.7           | 0.0257        | 0.0014         |

|               |                                                                                          |      |      |        |        |
|---------------|------------------------------------------------------------------------------------------|------|------|--------|--------|
| Chi3l3        | chitinase 3-like 3                                                                       | 14.8 | 3.0  | <0.001 | 0.0025 |
| Clecsf9       | C-type (calcium dependent, carbohydrate recognition domain) lectin, superfamily member 9 | 14.8 | 6.5  | 0.0095 | 0.0098 |
| Gp49a         | glycoprotein 49 A                                                                        | 13.4 | 8.4  | <0.001 | <0.001 |
| Ifi204        | interferon activated gene 204                                                            | 13.1 | 7.7  | <0.001 | <0.001 |
| Ifi205        | interferon activated gene 205                                                            | 13.1 | 7.0  | <0.001 | <0.001 |
| Gbp2          | guanylate nucleotide binding protein 2                                                   | 12.4 | 9.6  | <0.001 | <0.001 |
| Mpeg1         | macrophage expressed gene 1                                                              | 12.3 | 4.2  | <0.001 | 0.0018 |
| Sell          | selectin, lymphocyte                                                                     | 12.3 | 8.4  | <0.001 | <0.001 |
| Csf2rb1       | colony stimulating factor 2 receptor, beta 1, low-affinity (granulocyte-macrophage)      | 12.2 | 1.4  | <0.001 | 0.1344 |
| Ccl2          | chemokine (C-C motif) ligand 2                                                           | 12.0 | 8.7  | <0.001 | <0.001 |
| H2-T24        | histocompatibility 2, T region locus 24                                                  | 12.0 | 6.8  | <0.001 | <0.001 |
| Fpr-rs2       | formyl peptide receptor, related sequence 2                                              | 12.0 | 9.2  | <0.001 | <0.001 |
| Trim30        | tripartite motif protein 30                                                              | 11.9 | 10.5 | <0.001 | <0.001 |
| Ccr1          | chemokine (C-C motif) receptor 1                                                         | 11.6 | 6.1  | <0.001 | <0.001 |
| Rgl1          | ral guanine nucleotide dissociation stimulator,-like 1                                   | 11.5 | 6.5  | <0.001 | 0.0108 |
| Aif1          | allograft inflammatory factor 1                                                          | 11.4 | 8.2  | 0.0013 | 0.0028 |
| Ms4a4c        | membrane-spanning 4-domains, subfamily A, member 4C                                      | 11.4 | 7.8  | <0.001 | <0.001 |
| Ifi203        | interferon activated gene 203                                                            | 11.3 | 5.3  | <0.001 | <0.001 |
| Ncf4          | neutrophil cytosolic factor 4                                                            | 11.1 | 3.6  | <0.001 | 0.0018 |
| Lcn2          | lipocalin 2                                                                              | 10.8 | 5.4  | <0.001 | <0.001 |
| Cxcr4         | chemokine (C-X-C motif) receptor 4                                                       | 10.6 | 6.1  | 0.0012 | 0.0022 |
| A330075D07    | hypothetical protein A330075D07                                                          | 10.5 | 6.9  | <0.001 | <0.001 |
| Slpi          | secretory leukocyte protease inhibitor                                                   | 10.4 | 2.7  | <0.001 | <0.001 |
| Cd53          | CD53 antigen                                                                             | 10.4 | 4.7  | <0.001 | 0.0036 |
| Tgtp          | T-cell specific GTPase                                                                   | 10.1 | 18.6 | 0.0017 | <0.001 |
| Tyrobp        | TYRO protein tyrosine kinase binding protein                                             | 10.0 | 3.7  | <0.001 | 0.0019 |
| Ccr12         | chemokine (C-C motif) receptor-like 2                                                    | 9.3  | 4.6  | 0.0358 | 0.0020 |
| Tgfb1         | transforming growth factor, beta 1                                                       | 9.3  | 2.0  | 0.0297 | 0.3524 |
| Itgb2         | integrin beta 2                                                                          | 9.1  | 4.2  | <0.001 | <0.001 |
| Hdc           | histidine decarboxylase                                                                  | 9.0  | 7.1  | <0.001 | 0.0017 |
| Sln1          | schlafen 1                                                                               | 9.0  | 6.1  | <0.001 | <0.001 |
| Hck           | hemopoietic cell kinase                                                                  | 8.9  | 5.2  | <0.001 | <0.001 |
| Il1rn         | interleukin 1 receptor antagonist                                                        | 8.9  | 8.8  | <0.001 | <0.001 |
| Vav1          | vav 1 oncogene                                                                           | 8.6  | 4.1  | 0.0046 | <0.001 |
| Prg           | proteoglycan, secretory granule                                                          | 8.6  | 5.4  | <0.001 | <0.001 |
| Cd52          | CD52 antigen                                                                             | 8.5  | 3.8  | <0.001 | <0.001 |
| Plaur         | urokinase plasminogen activator receptor                                                 | 8.3  | 2.3  | 0.0092 | 0.0074 |
| Nmi           | N-myc (and STAT) interactor                                                              | 8.0  | 13.0 | 0.0011 | 0.0369 |
| Mmp3          | matrix metalloproteinase 3                                                               | 8.0  | 4.7  | <0.001 | <0.001 |
| Tnfrsf1b      | tumor necrosis factor receptor superfamily, member 1b                                    | 7.8  | 3.7  | <0.001 | <0.001 |
| Chi3l1        | chitinase 3-like 1                                                                       | 7.8  | 8.8  | 0.0135 | 0.0053 |
| Ccl12         | chemokine (C-C motif) ligand 12                                                          | 7.5  | 5.2  | 0.0062 | <0.001 |
| Timp1         | tissue inhibitor of metalloproteinase 1                                                  | 7.5  | 4.9  | <0.001 | <0.001 |
| Hcph          | hemopoietic cell phosphatase                                                             | 7.4  | 2.0  | 0.0213 | 0.0087 |
| Sprr2a        | small proline-rich protein 2A                                                            | 7.3  | 3.5  | <0.001 | <0.001 |
| Krt2-5        | keratin complex 2, basic, gene 5                                                         | 7.1  | 4.8  | <0.001 | <0.001 |
| 9130009C22Rik | RIKEN cDNA 9130009C22 gene                                                               | 7.0  | 6.6  | <0.001 | <0.001 |
| Samhd1        | SAM domain and HD domain, 1                                                              | 6.9  | 6.0  | <0.001 | <0.001 |
| Gbp3          | guanylate nucleotide binding protein 3                                                   | 6.4  | 7.7  | 0.0010 | <0.001 |
| Fes           | feline sarcoma oncogene                                                                  | 6.4  | 2.1  | 0.0192 | <0.001 |
| Ptpnc         | protein tyrosine phosphatase, receptor type, C                                           | 6.2  | 4.0  | 0.0042 | 0.0054 |

|               |                                                                                                                  |     |      |        |        |
|---------------|------------------------------------------------------------------------------------------------------------------|-----|------|--------|--------|
| ligp-pending  | interferon-inducible GTPase                                                                                      | 6.1 | 10.1 | 0.0065 | <0.001 |
| Fpr1          | formyl peptide receptor 1                                                                                        | 6.1 | 3.2  | 0.0382 | 0.1045 |
| Cd83          | CD83 antigen                                                                                                     | 6.0 | 1.4  | 0.0269 | 0.0055 |
| Psmb8         | proteasome (prosome, macropain) subunit, beta type 8 (large multifunctional protease 7)                          | 6.0 | 4.9  | <0.001 | <0.001 |
| Saa2          | serum amyloid A 2                                                                                                | 6.0 | 3.0  | <0.001 | <0.001 |
| Clecsf6       | C-type (calcium dependent, carbohydrate recognition domain) lectin, superfamily member 6                         | 5.9 | 1.6  | 0.0204 | 0.0092 |
| Krt1-16       | keratin complex 1, acidic, gene 16                                                                               | 5.9 | 7.0  | 0.0030 | <0.001 |
| Irf1          | interferon inducible protein 1                                                                                   | 5.9 | 6.2  | <0.001 | <0.001 |
| Stat1         | signal transducer and activator of transcription 1                                                               | 5.8 | 5.5  | <0.001 | <0.001 |
| Lcp1          | lymphocyte cytosolic protein 1                                                                                   | 5.6 | 2.0  | 0.0018 | 0.0649 |
| Tap1          | transporter 1, ATP-binding cassette, sub-family B (MDR/TAP)                                                      | 5.4 | 4.6  | <0.001 | <0.001 |
| Mlp           | MARCKS-like protein                                                                                              | 5.4 | 4.5  | <0.001 | <0.001 |
| Cd14          | CD14 antigen                                                                                                     | 5.3 | 2.2  | <0.001 | 0.0037 |
| Sprr2b        | small proline-rich protein 2B                                                                                    | 5.2 | 1.6  | <0.001 | 0.0020 |
| Bst1          | bone marrow stromal cell antigen 1                                                                               | 5.0 | 2.1  | 0.0383 | 0.1593 |
| Sema4d        | sema domain, immunoglobulin domain (Ig), transmembrane domain (TM) and short cytoplasmic domain, (semaphorin) 4D | 4.9 | 3.6  | <0.001 | <0.001 |
| Ninj1         | ninjurin 1                                                                                                       | 4.8 | 4.3  | <0.001 | 0.0138 |
| Apbb1ip       | amyloid beta (A4) precursor protein-binding, family B, member 1 interacting protein                              | 4.8 | 2.6  | <0.001 | 0.0047 |
| Slc7a8        | solute carrier family 7 (cationic amino acid transporter, y+ system), member 8                                   | 4.8 | 3.0  | <0.001 | 0.0100 |
| 2010008K16Rik | RIKEN cDNA 2010008K16 gene                                                                                       | 4.7 | 4.2  | <0.001 | <0.001 |
| Pla2g7        | phospholipase A2, group VII (platelet-activating factor acetylhydrolase, plasma)                                 | 4.7 | 3.4  | <0.001 | 0.0080 |
| Slc11a1       | solute carrier family 11 (proton-coupled divalent metal ion transporters), member 1                              | 4.6 | 2.2  | <0.001 | 0.0076 |
| Thbs1         | thrombospondin 1                                                                                                 | 4.6 | 2.8  | <0.001 | 0.0050 |
| Ctsz          | cathepsin Z                                                                                                      | 4.6 | 2.7  | <0.001 | 0.0090 |
| Ctss          | cathepsin S                                                                                                      | 4.6 | 2.5  | <0.001 | 0.0024 |
| Evl           | Ena-vasodilator stimulated phosphoprotein                                                                        | 4.6 | 2.6  | <0.001 | 0.0097 |
| Laptm5        | lysosomal-associated protein transmembrane 5                                                                     | 4.6 | 2.2  | 0.0021 | 0.0293 |
| Tlr6          | toll-like receptor 6                                                                                             | 4.5 | 2.2  | 0.0023 | 0.0017 |
| Igtp          | interferon gamma induced GTPase                                                                                  | 4.4 | 6.9  | 0.0017 | <0.001 |
| Gp38          | glycoprotein 38                                                                                                  | 4.4 | 3.0  | <0.001 | 0.0129 |
| Csf1          | colony stimulating factor 1 (macrophage)                                                                         | 4.3 | 2.9  | <0.001 | 0.0012 |
| Lgals9        | lectin, galactose binding, soluble 9                                                                             | 4.3 | 4.0  | <0.001 | <0.001 |
| Lcp2          | lymphocyte cytosolic protein 2                                                                                   | 4.3 | 3.1  | <0.001 | <0.001 |
| Pira1         | paired-Ig-like receptor A1                                                                                       | 4.3 | 3.3  | <0.001 | 0.0021 |
| Dck           | deoxycytidine kinase                                                                                             | 4.3 | 3.5  | 0.0023 | 0.0803 |
| Ppicap        | peptidylprolyl isomerase C-associated protein                                                                    | 4.3 | 3.3  | <0.001 | <0.001 |
| Cyba          | cytochrome b-245, alpha polypeptide                                                                              | 4.2 | 2.1  | <0.001 | 0.0711 |
| F5            | coagulation factor V                                                                                             | 4.2 | 2.5  | 0.0014 | 0.3247 |
| C3ar1         | complement component 3a receptor 1                                                                               | 4.1 | 2.7  | <0.001 | 0.0047 |
| Msr1          | macrophage scavenger receptor 1                                                                                  | 4.1 | 4.7  | 0.0010 | 0.0051 |
| Dock2         | dedicator of cyto-kinesis 2                                                                                      | 4.0 | 2.2  | 0.0013 | 0.0091 |
| Lst1          | leukocyte specific transcript 1                                                                                  | 4.0 | 3.9  | <0.001 | <0.001 |
| Socs3         | suppressor of cytokine signaling 3                                                                               | 4.0 | 3.0  | 0.0013 | <0.001 |
| Csf2rb2       | colony stimulating factor 2 receptor, beta 2, low-affinity (granulocyte-macrophage)                              | 4.0 | 1.8  | <0.001 | 0.0014 |
| Lip1          | lysosomal acid lipase 1                                                                                          | 4.0 | 2.4  | <0.001 | 0.0347 |
| Cxcl1         | chemokine (C-X-C motif) ligand 1                                                                                 | 4.0 | 3.7  | 0.0271 | 0.0031 |
| Apobec1       | apolipoprotein B editing complex 1                                                                               | 3.9 | 3.7  | 0.0010 | <0.001 |

|               |                                                                   |     |     |        |        |
|---------------|-------------------------------------------------------------------|-----|-----|--------|--------|
| Lasp1         | LIM and SH3 protein 1                                             | 3.9 | 1.8 | 0.0335 | 0.0582 |
| Fxyd5         | FXYD domain-containing ion transport regulator 5                  | 3.8 | 1.9 | <0.001 | 0.0199 |
| Ccr2          | chemokine (C-C) receptor 2                                        | 3.8 | 2.2 | <0.001 | 0.0104 |
| Lyn           | Yamaguchi sarcoma viral (v-yes-1) oncogene homolog                | 3.8 | 3.2 | <0.001 | 0.0014 |
| Gtpi-pending  | interferon-g induced GTPase                                       | 3.8 | 5.6 | <0.001 | <0.001 |
| Coro1a        | coronin, actin binding protein 1A                                 | 3.8 | 2.2 | <0.001 | 0.0108 |
| Cd68          | CD68 antigen                                                      | 3.8 | 2.4 | <0.001 | 0.0089 |
| Ms4a4d        | membrane-spanning 4-domains, subfamily A, member 4D               | 3.8 | 3.8 | <0.001 | <0.001 |
| Pira3         | paired-Ig-like receptor A3                                        | 3.7 | 2.4 | <0.001 | 0.0053 |
| Sp100         | nuclear antigen Sp100                                             | 3.7 | 2.8 | 0.0036 | 0.0027 |
| Ccl9          | chemokine (C-C motif) ligand 9                                    | 3.7 | 1.9 | <0.001 | 0.0075 |
| H2-T17        | histocompatibility 2, T region locus 17                           | 3.7 | 2.5 | 0.0012 | 0.0011 |
| Ptafr         | platelet-activating factor receptor                               | 3.7 | 3.7 | 0.0158 | <0.001 |
| Sdcbp         | syndecan binding protein                                          | 3.6 | 2.9 | <0.001 | 0.0018 |
| Il7r          | interleukin 7 receptor                                            | 3.6 | 2.6 | <0.001 | <0.001 |
| Tmsb10        | thymosin, beta 10                                                 | 3.6 | 2.1 | <0.001 | 0.0071 |
| Ncf2          | neutrophil cytosolic factor 2                                     | 3.6 | 2.9 | <0.001 | <0.001 |
| Krt2-6a       | keratin complex 2, basic, gene 6a                                 | 3.5 | 3.6 | <0.001 | 0.0028 |
| Unc93b        | unc-93 homolog B (C. elegans)                                     | 3.5 | 2.0 | 0.0011 | 0.0227 |
| Ogfr          | opioid growth factor receptor                                     | 3.5 | 5.4 | <0.001 | 0.0035 |
| Irf1          | interferon regulatory factor 1                                    | 3.5 | 3.6 | <0.001 | <0.001 |
| Scap2         | src family associated phosphoprotein 2                            | 3.5 | 2.3 | <0.001 | <0.001 |
| Gdap10        | ganglioside-induced differentiation-associated-protein 10         | 3.5 | 3.3 | <0.001 | 0.0173 |
| Evi2          | ecotropic viral integration site 2                                | 3.4 | 2.8 | 0.0015 | 0.0069 |
| Cybb          | cytochrome b-245, beta polypeptide                                | 3.4 | 1.8 | 0.0067 | 0.0017 |
| Ftl1          | ferritin light chain 1                                            | 3.4 | 2.1 | <0.001 | 0.0128 |
| Lzp-s         | P lysozyme structural                                             | 3.4 | 0.7 | <0.001 | 0.2497 |
| Pnp           | purine-nucleoside phosphorylase                                   | 3.4 | 3.8 | <0.001 | <0.001 |
| Isgf3g        | interferon dependent positive acting transcription factor 3 gamma | 3.4 | 2.7 | <0.001 | 0.0011 |
| Il10rb        | interleukin 10 receptor, beta                                     | 3.3 | 2.0 | 0.0052 | 0.0031 |
| Ly86          | lymphocyte antigen 86                                             | 3.3 | 1.4 | <0.001 | 0.0446 |
| Myo1f         | myosin IF                                                         | 3.3 | 2.2 | 0.0018 | 0.0027 |
| Casp4         | caspase 4, apoptosis-related cysteine protease                    | 3.3 | 3.0 | <0.001 | 0.0011 |
| Hcls1         | hematopoietic cell specific Lyn substrate 1                       | 3.2 | 2.5 | <0.001 | 0.0045 |
| Tap2          | transporter 2, ATP-binding cassette, sub-family B (MDR/TAP)       | 3.2 | 3.4 | 0.0013 | <0.001 |
| Ptx3          | pentaxin related gene                                             | 3.2 | 5.8 | 0.0026 | 0.0098 |
| Gmfg          | glia maturation factor, gamma                                     | 3.2 | 2.1 | 0.0020 | 0.0085 |
| H2-T10        | histocompatibility 2, T region locus 10                           | 3.2 | 2.3 | <0.001 | 0.0031 |
| Pirb          | paired-Ig-like receptor B                                         | 3.2 | 1.8 | <0.001 | <0.001 |
| 1300004C08Rik | RIKEN cDNA 1300004C08 gene                                        | 3.1 | 3.4 | <0.001 | <0.001 |
| Icam1         | intercellular adhesion molecule                                   | 3.1 | 3.8 | 0.0031 | 0.0035 |
| Ltb           | lymphotoxin B                                                     | 3.1 | 3.8 | <0.001 | 0.0016 |
| Wbscr5        | Williams-Beuren syndrome chromosome region 5 homolog (human)      | 3.0 | 2.0 | <0.001 | 0.0020 |
| Hp            | haptoglobin                                                       | 3.0 | 2.0 | <0.001 | <0.001 |
| Psmb10        | proteasome (prosome, macropain) subunit, beta type 10             | 3.0 | 3.1 | 0.0017 | 0.0016 |
| Gsr           | glutathione reductase 1                                           | 3.0 | 1.5 | 0.0158 | 0.0297 |
| Snx10         | sorting nexin 10                                                  | 3.0 | 2.2 | <0.001 | <0.001 |
| Lyzs          | lysozyme                                                          | 3.0 | 1.3 | <0.001 | 0.2009 |
| Sfpi1         | SFFV proviral integration 1                                       | 3.0 | 2.3 | <0.001 | 0.0268 |

| <b>Down-regulated Genes</b> |                                                        |      |      |         |        |
|-----------------------------|--------------------------------------------------------|------|------|---------|--------|
| Temt                        | thioether S-methyltransferase                          | -6.5 | -3.4 | 0.0001  | 0.0007 |
| Thrsp                       | thyroid hormone responsive SPOT14 homolog (Rattus)     | -4.5 | -2.3 | 0.0558  | 0.0158 |
| Tbx14                       | T-box 14                                               | -3.9 | -2.0 | 0.0015  | 0.0100 |
| Cdo1                        | cysteine dioxygenase 1, cytosolic                      | -3.4 | -2.8 | 0.0015  | 0.0002 |
| Ereg                        | epiregulin                                             | -3.2 | -1.0 | 0.0017  | 0.0703 |
| Sprr2h                      | small proline-rich protein 2H                          | -2.9 | -1.3 | 0.0006  | 0.0941 |
| Nov                         | nephroblastoma overexpressed gene                      | -2.8 | -1.9 | 0.0003  | 0.0005 |
| 1110031K21Rik               | RIKEN cDNA 1110031K21 gene                             | -2.7 | -1.8 | 0.0317  | 0.0269 |
| Myoc                        | myocilin                                               | -2.6 | -1.8 | 0.0008  | 0.0021 |
| Enpp2                       | ectonucleotide pyrophosphatase/phosphodiesterase 2     | -2.5 | -1.6 | <0.0001 | 0.0036 |
| Tbx15                       | T-box 15                                               | -2.5 | -2.1 | 0.0063  | 0.0035 |
| Amot                        | angiomin                                               | -2.4 | -1.9 | <0.0001 | 0.0063 |
| Fgfbp1                      | fibroblast growth factor binding protein 1             | -2.3 | -1.8 | <0.0001 | 0.0020 |
| Sparcl1                     | SPARC-like 1 (mast9, hevin)                            | -2.3 | -1.6 | 0.0005  | 0.0248 |
| Ank1                        | ankyrin 1, erythroid                                   | -2.2 | -2.0 | 0.0002  | 0.0025 |
| Myl2                        | myosin, light polypeptide 2, regulatory, cardiac, slow | -2.2 | -1.9 | <0.0001 | 0.0011 |
