# Supplementary material for: Keratinocytes Determine Th1 Immunity during Early Experimental Leishmaniasis
Source: PubMed Central journal article supplement (PMC2861693; doi:10.1371/journal.ppat.1000871), 2010-04-29
Supplement: ppat.1000871.s003.pdf [file ppat.1000871.s003.pdf]

**Table S3. Genes which were stronger regulated in BALB/c mice**

MW N-fold = mean regulation compared to uninfected control, TTEST = p-value for differential regulation in BALB/c versus C57BL/6 (C57) mice.

| <b>Gene Symbol</b>        | <b>Gene Title</b>                                       | <b>MW N-fold Balb</b> | <b>MW N-fold C57</b> | <b>TTEST</b> |
|---------------------------|---------------------------------------------------------|-----------------------|----------------------|--------------|
| <b>Genes Up-regulated</b> |                                                         |                       |                      |              |
| Gbp1                      | guanylate nucleotide binding protein 1                  | 18.0                  | -1.6                 | 0.0007       |
| Ifi202b                   | interferon activated gene 202B                          | 5.2                   | 1.8                  | 0.0010       |
| Klra2                     | killer cell lectin-like receptor, subfamily A, member 2 | 16.5                  | 4.5                  | 0.0274       |
| Ptx3                      | pentaxin related gene                                   | 5.8                   | 3.2                  | 0.0280       |
