# Supplementary material for: Keratinocytes Determine Th1 Immunity during Early Experimental Leishmaniasis
Source: PubMed Central journal article supplement (PMC2861693; doi:10.1371/journal.ppat.1000871), 2010-04-29
Supplement: ppat.1000871.s004.pdf [file ppat.1000871.s004.pdf]

**Table S4. Genes which were stronger regulated in C57BL/6 mice**

MW N-fold = mean regulation compared to uninfected control, TTEST = p-value for differential regulation in C57BL/6 (C57) versus BALB/c (BALB) mice.

| Gene Symbol               | Gene Title                                                                               | MW N-fold C57 | MW N-fold BALB | TTEST  |
|---------------------------|------------------------------------------------------------------------------------------|---------------|----------------|--------|
| <b>Genes Up-regulated</b> |                                                                                          |               |                |        |
| Ccr5                      | chemokine (C-C motif) receptor 5                                                         | 142.5         | 8.1            | 0.0058 |
| Csf2rb1                   | colony stimulating factor 2 receptor, beta 1, low-affinity (granulocyte-macrophage)      | 12.2          | 1.4            | 0.0143 |
| AI447904                  | expressed sequence AI447904                                                              | 57.8          | 8.7            | 0.0123 |
| Spp1                      | secreted phosphoprotein 1                                                                | 28.3          | 4.8            | 0.0012 |
| F10                       | coagulation factor X                                                                     | 37.0          | 6.6            | 0.0251 |
| Ms4a6b                    | membrane-spanning 4-domains, subfamily A, member 6B                                      | 42.8          | 7.7            | 0.0446 |
| Lzp-s                     | P lysozyme structural                                                                    | 3.4           | 0.7            | 0.0135 |
| Chi3l3                    | chitinase 3-like 3                                                                       | 14.8          | 3.0            | <0.001 |
| Tgfb1                     | transforming growth factor, beta 1                                                       | 9.3           | 2.0            | 0.0487 |
| Cd83                      | CD83 antigen                                                                             | 6.0           | 1.4            | 0.0416 |
| Itgam                     | integrin alpha M                                                                         | 20.5          | 4.8            | 0.0202 |
| Il1b                      | interleukin 1 beta                                                                       | 39.2          | 9.8            | 0.0337 |
| Saa3                      | serum amyloid A 3                                                                        | 28.1          | 7.2            | 0.0373 |
| Slpi                      | secretory leukocyte protease inhibitor                                                   | 10.4          | 2.7            | 0.0027 |
| Clecsf6                   | C-type (calcium dependent, carbohydrate recognition domain) lectin, superfamily member 6 | 5.9           | 1.6            | 0.0179 |
| S100a8                    | S100 calcium binding protein A8 (calgranulin A)                                          | 18.8          | 5.7            | <0.001 |
| Spr2b                     | small proline-rich protein 2B                                                            | 5.2           | 1.6            | <0.001 |
| Irg1                      | immunoresponsive gene 1                                                                  | 77.8          | 24.8           | 0.0184 |
| S100a9                    | S100 calcium binding protein A9 (calgranulin B)                                          | 24.6          | 8.3            | 0.0035 |
| Mpeg1                     | macrophage expressed gene 1                                                              | 12.3          | 4.2            | 0.0031 |
| Clecsf8                   | C-type (calcium dependent, carbohydrate recognition domain) lectin, superfamily member 8 | 40.7          | 14.1           | 0.0059 |
| Slfn4                     | schlafen 4                                                                               | 52.2          | 18.4           | 0.0093 |
| Lcp1                      | lymphocyte cytosolic protein 1                                                           | 5.6           | 2.0            | 0.0231 |
| Spr2a                     | small proline-rich protein 2A                                                            | 6.3           | 2.3            | 0.0015 |
| Tyrobp                    | TYRO protein tyrosine kinase binding protein                                             | 10.0          | 3.7            | 0.0168 |
| Cd14                      | CD14 antigen                                                                             | 5.3           | 2.2            | 0.0029 |
| Lyzs                      | lysozyme                                                                                 | 3.0           | 1.3            | 0.0028 |
| Ly86                      | lymphocyte antigen 86                                                                    | 3.3           | 1.4            | 0.0045 |
| Cd52                      | CD52 antigen                                                                             | 8.5           | 3.8            | 0.0092 |
| Cd53                      | CD53 antigen                                                                             | 10.4          | 4.7            | 0.0149 |
| Plac8                     | placenta-specific 8                                                                      | 30.5          | 14.0           | 0.0223 |
| Csf2rb2                   | colony stimulating factor 2 receptor, beta 2, low-affinity (granulocyte-macrophage)      | 4.0           | 1.8            | 0.0076 |
| Itgb2                     | integrin beta 2                                                                          | 9.1           | 4.2            | 0.0013 |
| Tnfrsf1b                  | tumor necrosis factor receptor superfamily, member 1b                                    | 7.8           | 3.7            | <0.001 |
| Fcgr2b                    | Fc receptor, IgG, low affinity IIb                                                       | 2.7           | 1.3            | 0.0013 |
| Basp1                     | brain abundant, membrane attached signal protein 1                                       | 15.3          | 7.3            | 0.0116 |
| Slc11a1                   | solute carrier family 11 (proton-coupled divalent metal ion transporters), member 1      | 4.6           | 2.2            | 0.0013 |
| Adam8                     | a disintegrin and metalloprotease domain 8                                               | 23.1          | 11.1           | 0.0072 |
| Cyba                      | cytochrome b-245, alpha polypeptide                                                      | 4.2           | 2.1            | 0.0125 |
| Gsr                       | glutathione reductase 1                                                                  | 3.0           | 1.5            | 0.0071 |
| Fxyd5                     | FXYD domain-containing ion transport regulator 5                                         | 3.8           | 1.9            | 0.0060 |
| Lcn2                      | lipocalin 2                                                                              | 10.8          | 5.4            | 0.0376 |
| Cxcl2                     | chemokine (C-X-C motif) ligand 2                                                         | 23.9          | 12.2           | 0.0035 |
| Ptpns1                    | protein tyrosine phosphatase, non-receptor type                                          | 2.8           | 1.5            | 0.0065 |

|                             |                                                                                     |      |      |        |
|-----------------------------|-------------------------------------------------------------------------------------|------|------|--------|
|                             | substrate 1                                                                         |      |      |        |
| Ccl9                        | chemokine (C-C motif) ligand 9                                                      | 3.7  | 1.9  | 0.0076 |
| Ccr1                        | chemokine (C-C motif) receptor 1                                                    | 11.6 | 6.1  | 0.0179 |
| Slfn3                       | schlafen 3                                                                          | 42.8 | 22.5 | 0.0377 |
| Ifi205                      | interferon activated gene 205                                                       | 13.1 | 7.0  | 0.0015 |
| Cybb                        | cytochrome b-245, beta polypeptide                                                  | 3.4  | 1.8  | <0.001 |
| Ctss                        | cathepsin S                                                                         | 4.6  | 2.5  | 0.0349 |
| Apbb1ip                     | amyloid beta (A4) precursor protein-binding, family B, member 1 interacting protein | 4.8  | 2.6  | 0.0255 |
| Dock2                       | dedicator of cyto-kinesis 2                                                         | 4.0  | 2.2  | 0.0232 |
| BC032204                    | cDNA sequence BC032204                                                              | 2.5  | 1.4  | 0.0029 |
| Ccr2                        | chemokine (C-C) receptor 2                                                          | 3.8  | 2.2  | 0.0046 |
| 1110007C                    | RIKEN cDNA 1110007C09 gene                                                          | 2.7  | 1.5  | 0.0128 |
| 09Rik                       |                                                                                     |      |      |        |
| Evl                         | Ena-vasodilator stimulated phosphoprotein                                           | 4.6  | 2.6  | 0.0110 |
| <b>Genes Down-regulated</b> |                                                                                     |      |      |        |
| Sprr2h                      | small proline-rich protein 2H                                                       | -2.9 | -1.3 | 0.0049 |
| Temt                        | thioether S-methyltransferase                                                       | -6.5 | -3.4 | 0.0022 |
| Tbx14                       | T-box 14                                                                            | -3.9 | -2.0 | 0.0421 |
