# Supplementary material for: Keratinocytes Determine Th1 Immunity during Early Experimental Leishmaniasis
Source: PubMed Central journal article supplement (PMC2861693; doi:10.1371/journal.ppat.1000871), 2010-04-29
Supplement: ppat.1000871.s005.pdf [file ppat.1000871.s005.pdf]

**Table S5. Absolute expression levels of genes analyzed by *Real-time* PCR in uninfected skin of BALB/c and C57BL/6 mice (expressed as copy number/ 10000 copies of glyceraldehyde-3-phosphate dehydrogenase (GAPDH))**

| <b>Gene</b>                    | <b>Mean copy number/<br/>10000 copies GAPDH<br/>BALB/c</b> | <b>SE copy<br/>number</b> | <b>Mean copy number/<br/>10000 copies GAPDH<br/>C57BL/6</b> | <b>SE copy<br/>number</b> |
|--------------------------------|------------------------------------------------------------|---------------------------|-------------------------------------------------------------|---------------------------|
| <b>IL-1<math>\beta</math></b>  | 1,900                                                      | 0,541                     | 15,871                                                      | 4,721                     |
| <b>IL-4</b>                    | 0,020                                                      | 0,005                     | 0,020                                                       | 0,003                     |
| <b>IL-6</b>                    | 0,596                                                      | 0,002                     | 0,371                                                       | 0,031                     |
| <b>IL-10</b>                   | 1,667                                                      | 0,982                     | 1,972                                                       | 0,002                     |
| <b>IL-12p35</b>                | 0,522                                                      | 0,247                     | 0,878                                                       | 0,212                     |
| <b>IL-12p40</b>                | 0,738                                                      | 0,302                     | 0,980                                                       | 0,614                     |
| <b>IL-13</b>                   | 2,679                                                      | 0,872                     | 1,365                                                       | 0,076                     |
| <b>TGF-<math>\beta</math></b>  | 28,905                                                     | 11,113                    | 28,106                                                      | 19,654                    |
| <b>TNF-<math>\alpha</math></b> | 2,734                                                      | 1,332                     | 3,700                                                       | 0,691                     |
| <b>Opn</b>                     | 31,328                                                     | 9,068                     | 29,617                                                      | 18,235                    |
| <b>CXCL1</b>                   | 0,695                                                      | 0,048                     | 2,546                                                       | 1,996                     |
| <b>CXCL2</b>                   | 0,771                                                      | 0,005                     | 1,055                                                       | 0,068                     |
| <b>CXCL9</b>                   | 1,300                                                      | 1,029                     | 0,916                                                       | 0,692                     |
| <b>CXCL10</b>                  | 6,604                                                      | 4,614                     | 3,348                                                       | 3,165                     |
| <b>CCL2</b>                    | 4,594                                                      | 3,628                     | 3,757                                                       | 2,134                     |
| <b>CCL3</b>                    | 0,441                                                      | 0,258                     | 0,197                                                       | 0,089                     |
| <b>CCL4</b>                    | 0,920                                                      | 0,458                     | 0,409                                                       | 0,110                     |
| <b>CCL5</b>                    | 7,471                                                      | 4,193                     | 6,898                                                       | 2,234                     |
| <b>CCL7</b>                    | 5,843                                                      | 2,360                     | 3,434                                                       | 2,774                     |
| <b>CCR1</b>                    | 3,854                                                      | 0,958                     | 5,920                                                       | 1,447                     |
| <b>CCR2</b>                    | 7,005                                                      | 1,085                     | 12,807                                                      | 1,628                     |
| <b>CCR5</b>                    | 2,006                                                      | 0,087                     | 4,068                                                       | 1,197                     |
| <b>Temt</b>                    | 0,954                                                      | 0,024                     | 0,883                                                       | 0,0351                    |
| <b>Sprr2h</b>                  | 2,887                                                      | 1,065                     | 6,068                                                       | 0,335                     |
| <b>SLPI</b>                    | 5,997                                                      | 1,065                     | 8,036                                                       | 0,334                     |
| <b>MRP8</b>                    | 14,213                                                     | 8,147                     | 12,547                                                      | 4,999                     |
| <b>MRP14</b>                   | 6,345                                                      | 0,521                     | 22,370                                                      | 4,734                     |
| <b>F4/80</b>                   | 17,212                                                     | 2,580                     | 26,521                                                      | 15,312                    |
| <b>Ym-1</b>                    | 0,887                                                      | 0,001                     | 1,544                                                       | 0,098                     |
| <b>Sprr2a</b>                  | 2,054                                                      | 0,887                     | 2,001                                                       | 1,065                     |
