# Supplementary material for: Keratinocytes Determine Th1 Immunity during Early Experimental Leishmaniasis
Source: PubMed Central journal article supplement (PMC2861693; doi:10.1371/journal.ppat.1000871), 2010-04-29
Supplement: ppat.1000871.s006.pdf [file ppat.1000871.s006.pdf]

**Table S6. Functional clusters overrepresented in genes regulated in C57BL/6 mice.**

| <b>Functional gene clusters overrepresented among genes up-regulated in C57BL/6 mice</b> | <b>Z Score</b> | <b>P-value</b> | <b>% of selection</b> | <b>% of all</b> |
|------------------------------------------------------------------------------------------|----------------|----------------|-----------------------|-----------------|
| <b>molecular function</b>                                                                |                |                |                       |                 |
| chemokine activity                                                                       | 12.064         | <0.001         | 5.47                  | 0.37            |
| IgG binding                                                                              | 8.641          | <0.001         | 1.49                  | 0.06            |
| cytokine activity                                                                        | 8.004          | <0.001         | 9.45                  | 1.89            |
| receptor activity                                                                        | 4.574          | <0.001         | 19.90                 | 10.25           |
| signal transducer activity                                                               | 6.95           | 0              | 36.8                  | 18.2            |
| hematopoietin/interferon-class (D200-domain) cytokine receptor activity                  | 3.657          | 0.007          | 2.49                  | 0.57            |
| interleukin receptor activity                                                            | 3.377          | 0.022          | 1.49                  | 0.27            |
| hematopoietin/interferon-class (D200-domain) cytokine receptor binding                   | 2.926          | 0.02           | 1.49                  | 0.33            |
| hydrolase activity                                                                       | 2.015          | 0.045          | 19.9                  | 14.9            |
| <b>biological process</b>                                                                |                |                |                       |                 |
| immune response                                                                          | 20.297         | <0.001         | 43.28                 | 7.08            |
| chemotaxis                                                                               | 15.939         | <0.001         | 13.43                 | 1.23            |
| humoral immune response                                                                  | 9.233          | <0.001         | 9.45                  | 1.54            |
| neutrophil chemotaxis                                                                    | 8.931          | <0.001         | 2.49                  | 0.14            |
| phagocytosis                                                                             | 8.879          | <0.001         | 3.48                  | 0.27            |
| antigen presentation                                                                     | 6.4            | <0.001         | 3.98                  | 0.59            |
| JAK-STAT cascade                                                                         | 6.338          | <0.001         | 2.99                  | 0.36            |
| cytokine production                                                                      | 5.72           | <0.001         | 4.48                  | 0.84            |
| myeloid cell differentiation                                                             | 5.276          | <0.001         | 3.98                  | 0.77            |
| cytokine and chemokine mediated signaling pathway                                        | 5.138          | <0.001         | 2.49                  | 0.36            |
| keratinization                                                                           | 5.107          | 0.001          | 1.99                  | 0.24            |
| cell-mediated immune response                                                            | 4.054          | 0.002          | 2.49                  | 0.50            |
| apoptosis                                                                                | 3.833          | 0.002          | 11.44                 | 5.41            |
| positive regulation of cytokine production                                               | 3.352          | 0.014          | 1.99                  | 0.44            |
| T-helper 1 type immune response                                                          | 3.19           | 0.01           | 1.99                  | 0.47            |
| T cell activation                                                                        | 2.83           | 0.02           | 2.99                  | 1.01            |
| I-kappaB kinase/NF-kappaB cascade                                                        | 2.419          | 0.03           | 2.49                  | 0.90            |
