# Supplementary material for: Keratinocytes Determine Th1 Immunity during Early Experimental Leishmaniasis
Source: PubMed Central journal article supplement (PMC2861693; doi:10.1371/journal.ppat.1000871), 2010-04-29
Supplement: ppat.1000871.s007.pdf [file ppat.1000871.s007.pdf]

**Table S7. Functional clusters overrepresented in genes regulated in BALB/c mice.**

| <b>Functional gene clusters overrepresented among genes up-regulated in BALB/c mice</b> | <b>Z Score</b> | <b>P-value</b> | <b>% of selection</b> | <b>% of all</b> |
|-----------------------------------------------------------------------------------------|----------------|----------------|-----------------------|-----------------|
| <b>molecular function</b>                                                               |                |                |                       |                 |
| chemokine activity                                                                      | 14.328         | <0.001         | 7.48                  | 0.37            |
| cytokine activity                                                                       | 10.508         | <0.001         | 13.61                 | 1.90            |
| signal transducer activity                                                              | 5.864          | <0.001         | 36.73                 | 18.25           |
| hematopoietin/interferon-class (D200-domain) cytokine receptor binding                  | 4.987          | <0.001         | 2.72                  | 0.34            |
| receptor activity                                                                       | 2.698          | 0.009          | 17.01                 | 10.31           |
| hydrolase activity                                                                      | 2.378          | 0.017          | 21.77                 | 14.87           |
| <b>biological process</b>                                                               |                |                |                       |                 |
| immune response                                                                         | 17.366         | <0.001         | 43.54                 | 7.11            |
| chemotaxis                                                                              | 13.77          | <0.001         | 13.61                 | 1.23            |
| JAK-STAT cascade                                                                        | 6.254          | <0.001         | 3.40                  | 0.36            |
| nitric oxide biosynthesis                                                               | 6.171          | 0.002          | 2.72                  | 0.24            |
| neutrophil chemotaxis                                                                   | 6.159          | <0.0010        | 2.04                  | 0.14            |
| cytokine production                                                                     | 5.254          | <0.0010        | 4.76                  | 0.84            |
| humoral immune response                                                                 | 5.193          | <0.0010        | 6.80                  | 1.56            |
| cellular defense response                                                               | 5.103          | <0.0010        | 5.44                  | 1.10            |
| myeloid cell differentiation                                                            | 4.637          | 0.001          | 4.08                  | 0.77            |
| keratinization                                                                          | 4.477          | 0.004          | 2.04                  | 0.24            |
| phagocytosis                                                                            | 4.168          | 0.005          | 2.04                  | 0.27            |
| apoptosis                                                                               | 3.7            | <0.0010        | 12.24                 | 5.41            |
| cytokine and chemokine mediated signaling pathway                                       | 3.459          | 0.015          | 2.04                  | 0.36            |
| antigen presentation                                                                    | 3.43           | 0.011          | 2.72                  | 0.59            |
| T cell activation                                                                       | 2.92           | 0.022          | 3.40                  | 1.01            |
