# Supplementary material for: Keratinocytes Determine Th1 Immunity during Early Experimental Leishmaniasis
Source: PubMed Central journal article supplement (PMC2861693; doi:10.1371/journal.ppat.1000871), 2010-04-29
Supplement: ppat.1000871.s008.pdf [file ppat.1000871.s008.pdf]

**Table S8. Absolute expression levels of genes analyzed by *Real-time* PCR in keratinocytes isolated from uninfected skin of BALB/c and C57BL/6 mice (expressed as copy number/ 10000 copies of glyceraldehyde-3-phosphate dehydrogenase (GAPDH))**

| <b>Gene</b>                   | <b>Mean copy number/<br/>10000 copies GAPDH<br/>BALB/c</b> | <b>SEM copy<br/>number</b> | <b>Mean copy number/<br/>10000 copies GAPDH<br/>C57BL/6</b> | <b>SEM<br/>copy<br/>number</b> |
|-------------------------------|------------------------------------------------------------|----------------------------|-------------------------------------------------------------|--------------------------------|
| <b>IL-1<math>\beta</math></b> | 7,646                                                      | 3,558                      | 0,670                                                       | 0,327                          |
| <b>IL-4</b>                   | 0,038                                                      | 0,017                      | 0,040                                                       | 0,013                          |
| <b>IL-6</b>                   | 1,078                                                      | 0,889                      | 0,903                                                       | 0,471                          |
| <b>IL-10</b>                  | 4,687                                                      | 2,730                      | 3,721                                                       | 2,100                          |
| <b>IL-12p40</b>               | 1,883                                                      | 1,033                      | 0,632                                                       | 0,291                          |
| <b>TGF-b</b>                  | 0,316                                                      | 0,142                      | 1,801                                                       | 1,278                          |
| <b>TNF-a</b>                  | 8,724                                                      | 5,054                      | 3,173                                                       | 1,682                          |
| <b>Opn</b>                    | 47,673                                                     | 17,290                     | 67,588                                                      | 32,388                         |
| <b>CXCL2</b>                  | 0,056                                                      | 0,006                      | 0,008                                                       | 0,004                          |
| <b>CXCL9</b>                  | 0,309                                                      | 0,033                      | 1,464                                                       | 0,875                          |
| <b>CXCL10</b>                 | 0,309                                                      | 0,033                      | 0,502                                                       | 0,268                          |
| <b>CCL2</b>                   | 6,745                                                      | 2,756                      | 0,557                                                       | 0,259                          |
| <b>CCL3</b>                   | 2,353                                                      | 1,315                      | 1,509                                                       | 0,751                          |
| <b>CCL4</b>                   | 0,346                                                      | 0,236                      | 0,194                                                       | 0,059                          |
| <b>CCL5</b>                   | 3,911                                                      | 2,129                      | 0,947                                                       | 0,445                          |
| <b>CCL7</b>                   | 0,020                                                      | 0,008                      | 2,002                                                       | 0,040                          |
| <b>CCR1</b>                   | 1,966                                                      | 0,006                      | 1,050                                                       | 0,040                          |
| <b>CCR2</b>                   | 0,044                                                      | 0,002                      | 13,540                                                      | 4,891                          |
| <b>Temt</b>                   | 3,054                                                      | 2,518                      | 0,464                                                       | 1,995                          |
| <b>MRP 8</b>                  | 4,888                                                      | 2,978                      | 3,449                                                       | 2,006                          |
| <b>MRP 14</b>                 | 86,208                                                     | 51,173                     | 97,412                                                      | 52,600                         |
| <b>Sprr2a</b>                 | 0,584                                                      | 0,004                      | 2,443                                                       | 0,289                          |
