# Supplementary material for: Keratinocytes Determine Th1 Immunity during Early Experimental Leishmaniasis
Source: PubMed Central journal article supplement (PMC2861693; doi:10.1371/journal.ppat.1000871), 2010-04-29
Supplement: ppat.1000871.s009.pdf [file ppat.1000871.s009.pdf]

**Table S9. cDNA sequences used as templates for RISH**

| <b>Gene</b>  | <b>Genebank Accession</b> | <b>Nucleotides</b> |
|--------------|---------------------------|--------------------|
| CXCL2        | NM_009140.1               | 13-1024            |
| CXCL10       | M86829.1                  | 9-849              |
| Ym-1         | NM_009892.1               | 1-1385             |
| TNF $\alpha$ | gi 7305584                | 15-1537            |
| opn          | NM_009263                 | 102-987            |
